# Supplementary material for: Lycocasine A, a Lycopodium Alkaloid from Lycopodiastrum casuarinoides and Its Acid-Sensing Ion Channel 1a Inhibitory Activity
Source: MDPI journal article supplement (doi:10.3390/molecules29071581), 2024-04-01
Supplement: s1 [file s1]

# **Lycocasine A, A *Lycopodium* Alkaloid from *Lycopodiastrum casuarinoides* and Its Acid-Sensing Ion Channel 1a Inhibitory Activity**

**Shuai Jiang<sup>1,2,†</sup>, Wen-Yan Li<sup>1,2,†</sup>, Bei-Bei Gao<sup>1,2</sup> and Qin-Shi Zhao<sup>1,2,\*</sup>**

<sup>1</sup> State Key Laboratory of Phytochemistry and Plant Resources in West China, Kunming Institute of Botany, Chinese Academy of Sciences, Kunming 650201, Yunnan, China

<sup>2</sup> University of Chinese Academy of Sciences, Beijing 100049, China

\* Correspondence: qinshizhao@mail.kib.ac.cn (Q.-S.Z.); Tel.: +86-871-65223058

<sup>†</sup> These authors contributed equally to this work.

## Contents of Supplementary Information

|                                                                                                                                                              |    |
|--------------------------------------------------------------------------------------------------------------------------------------------------------------|----|
| <b>Figure S1.</b> $^1\text{H}$ NMR spectrum of compound <b>1</b> in $\text{DMSO-}d_6$ (800 MHz).....                                                         | 3  |
| <b>Figure S2.</b> $^{13}\text{C}$ NMR and DEPT spectra of compound <b>1</b> in $\text{DMSO-}d_6$ (200 MHz).....                                              | 3  |
| <b>Figure S3.</b> HSQC spectrum of compound <b>1</b> in $\text{DMSO-}d_6$ (800 MHz).....                                                                     | 4  |
| <b>Figure S4.</b> HMBC spectrum of compound <b>1</b> in $\text{DMSO-}d_6$ (800 MHz).....                                                                     | 4  |
| <b>Figure S5.</b> $^1\text{H}$ – $^1\text{H}$ COSY spectrum of compound <b>1</b> in $\text{DMSO-}d_6$ (800 MHz) .....                                        | 5  |
| <b>Figure S6.</b> ROESY spectrum of compound <b>1</b> in $\text{DMSO-}d_6$ (800 MHz) .....                                                                   | 5  |
| <b>Figure S7.</b> UV spectrum of compound <b>1</b> .....                                                                                                     | 6  |
| <b>Figure S8.</b> IR spectrum of compound <b>1</b> .....                                                                                                     | 6  |
| <b>Figure S9.</b> HRESIMS spectrum of compound <b>1</b> .....                                                                                                | 7  |
| <b>Figure S10.</b> HPLC chromatogram of compound <b>1</b> (MeOH/ $\text{H}_2\text{O}$ / $\text{NH}_3\cdot\text{H}_2\text{O}$ , 45:55:0.05, 3.6 mL/min) ..... | 7  |
| <b>Figure S11.</b> $^1\text{H}$ NMR spectrum of compound <b>2</b> in $\text{CDCl}_3$ (400 MHz).....                                                          | 8  |
| <b>Figure S12.</b> $^{13}\text{C}$ NMR and DEPT spectra of compound <b>2</b> in $\text{CDCl}_3$ (100 MHz) .....                                              | 8  |
| <b>Figure S13.</b> $^1\text{H}$ NMR spectrum of compound <b>3</b> in $\text{CDCl}_3$ (400 MHz).....                                                          | 9  |
| <b>Figure S14.</b> $^{13}\text{C}$ NMR and DEPT spectra of compound <b>3</b> in $\text{CDCl}_3$ (100 MHz) .....                                              | 9  |
| <b>Figure S15.</b> $^1\text{H}$ NMR spectrum of compound <b>4</b> in $\text{CDCl}_3$ (400 MHz).....                                                          | 10 |
| <b>Figure S16.</b> $^{13}\text{C}$ NMR and DEPT spectra of compound <b>4</b> in $\text{CDCl}_3$ (100 MHz) .....                                              | 10 |
| <b>Figure S17.</b> $^1\text{H}$ NMR spectrum of compound <b>5</b> in $\text{CDCl}_3$ (600 MHz).....                                                          | 11 |
| <b>Figure S18.</b> $^{13}\text{C}$ NMR and DEPT spectra of compound <b>5</b> in $\text{CDCl}_3$ (150 MHz) .....                                              | 11 |
| <b>Figure S19.</b> $^1\text{H}$ NMR spectrum of compound <b>6</b> in $\text{CDCl}_3$ (600 MHz).....                                                          | 12 |
| <b>Figure S20.</b> $^{13}\text{C}$ NMR and DEPT spectra of compound <b>6</b> in $\text{CDCl}_3$ (150 MHz) .....                                              | 12 |
| <b>Figure S21.</b> $^1\text{H}$ NMR spectrum of compound <b>7</b> in $\text{CD}_3\text{OD}$ (400 MHz).....                                                   | 13 |
| <b>Figure S22.</b> $^{13}\text{C}$ NMR and DEPT spectra of compound <b>7</b> in $\text{CD}_3\text{OD}$ (100 MHz) .....                                       | 13 |
| <b>Figure S23.</b> $^1\text{H}$ NMR spectrum of compound <b>8</b> in $\text{CDCl}_3$ (600 MHz).....                                                          | 14 |
| <b>Figure S24.</b> $^{13}\text{C}$ NMR and DEPT spectra of compound <b>8</b> in $\text{CDCl}_3$ (150 MHz) .....                                              | 14 |
| <br><b>Table S1.</b> Detailed NMR parameters of compound <b>1</b> . .....                                                                                    | 15 |
| <b>Table S2.</b> Detailed NMR parameters of compound <b>2</b> . .....                                                                                        | 15 |
| <b>Table S3.</b> Detailed NMR parameters of compound <b>3</b> . .....                                                                                        | 16 |
| <b>Table S4.</b> Detailed NMR parameters of compound <b>4</b> . .....                                                                                        | 16 |
| <b>Table S5.</b> Detailed NMR parameters of compound <b>5</b> . .....                                                                                        | 16 |
| <b>Table S6.</b> Detailed NMR parameters of compound <b>6</b> . .....                                                                                        | 17 |
| <b>Table S7.</b> Detailed NMR parameters of compound <b>7</b> . .....                                                                                        | 17 |
| <b>Table S8.</b> Detailed NMR parameters of compound <b>8</b> . .....                                                                                        | 17 |

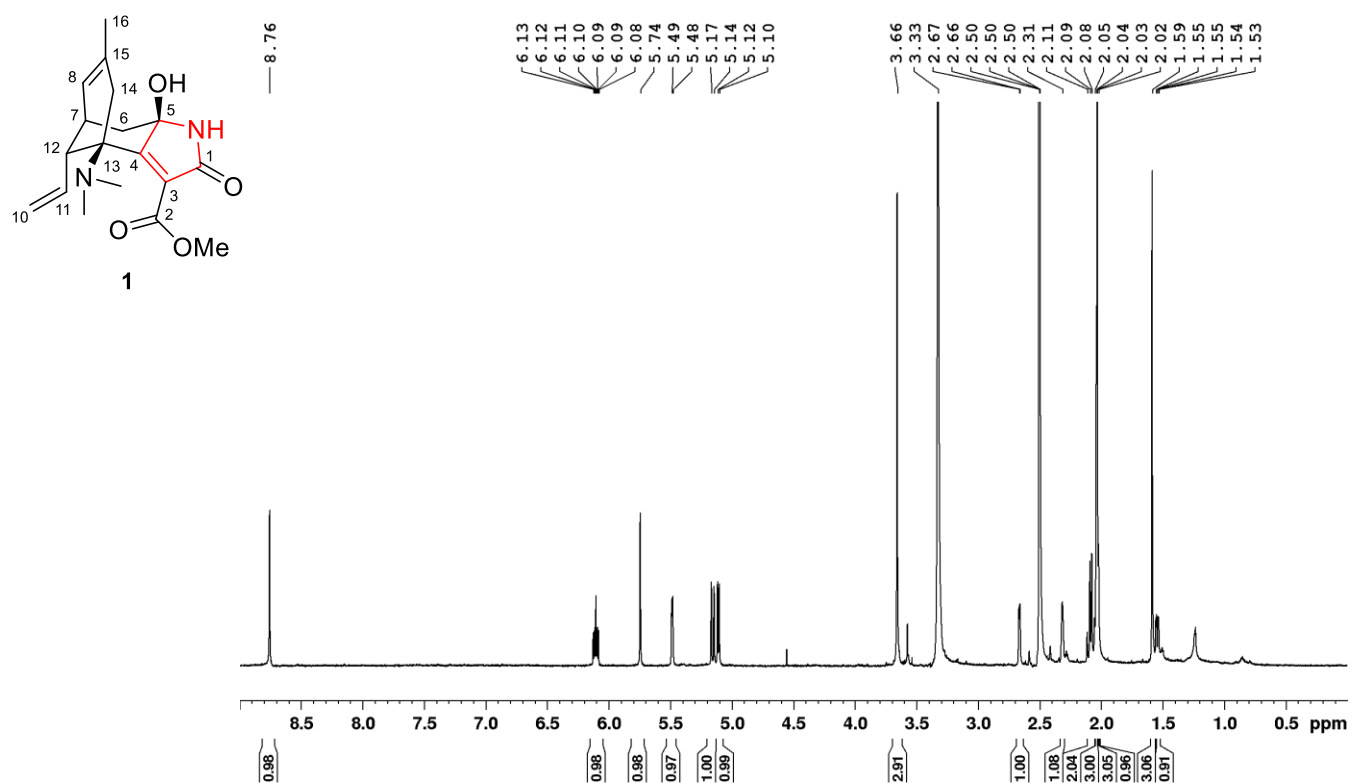

**Figure S1.** <sup>1</sup>H NMR spectrum of compound **1** in DMSO-*d*<sub>6</sub> (800 MHz)

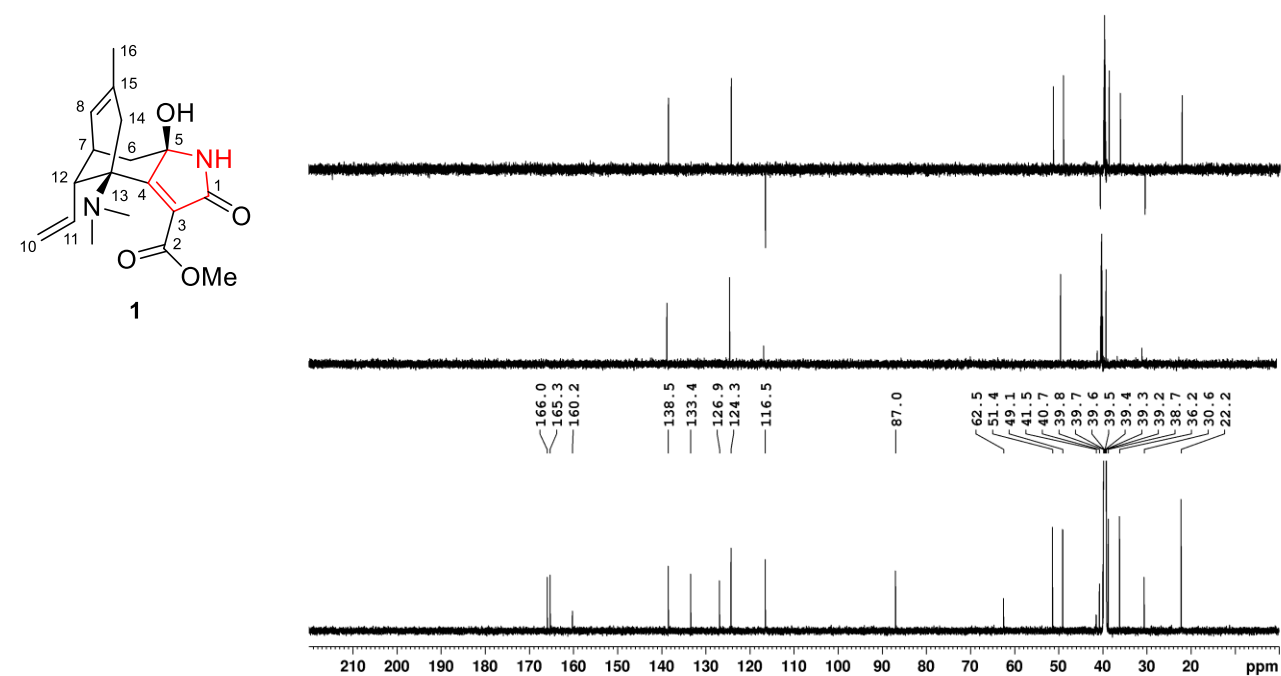

**Figure S2.** <sup>13</sup>C NMR and DEPT spectra of compound **1** in DMSO-*d*<sub>6</sub> (200 MHz)

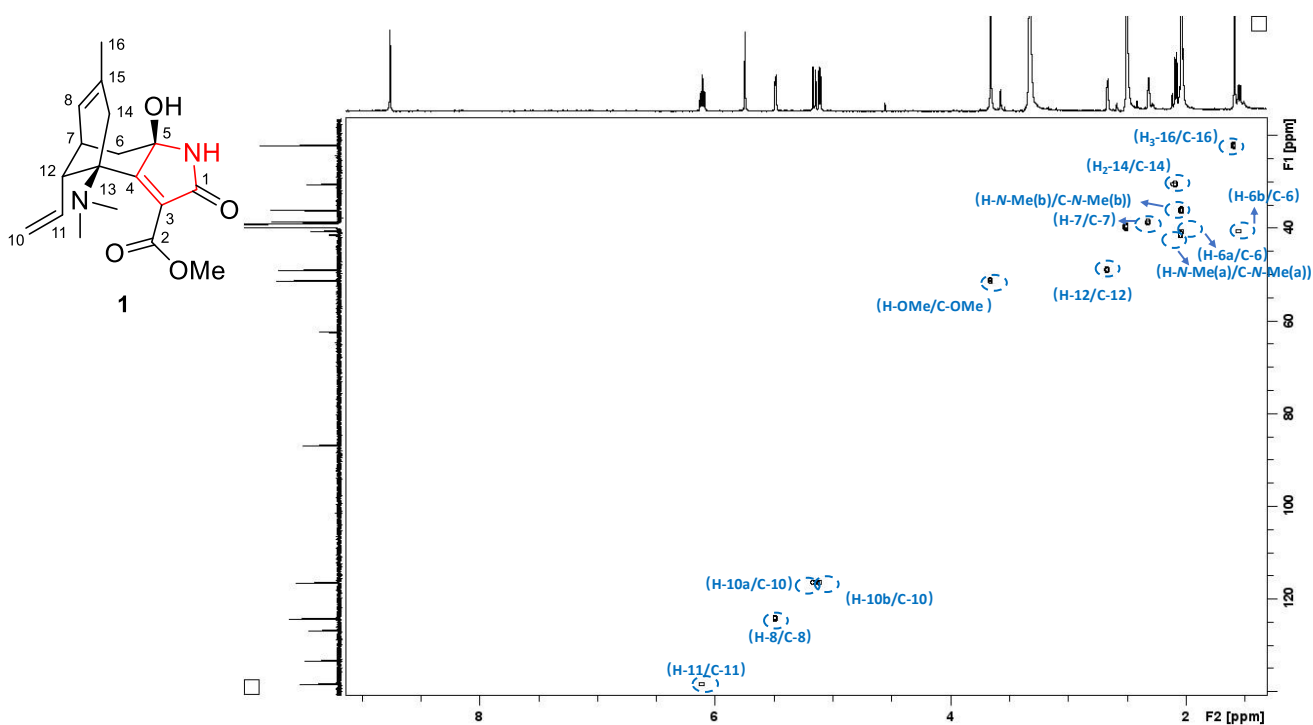

**Figure S3.** HSQC spectrum of compound **1** in DMSO-*d*<sub>6</sub> (800 MHz)

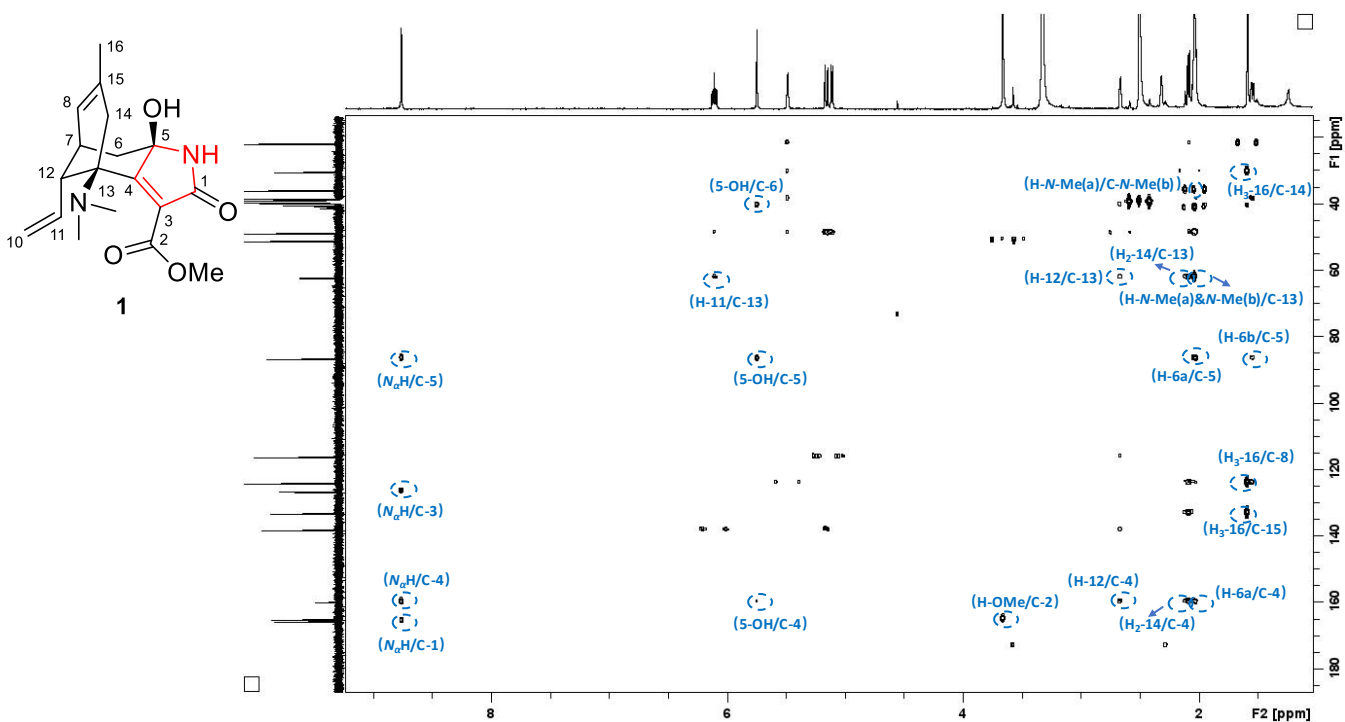

**Figure S4.** HMBC spectrum of compound **1** in DMSO-*d*<sub>6</sub> (800 MHz)

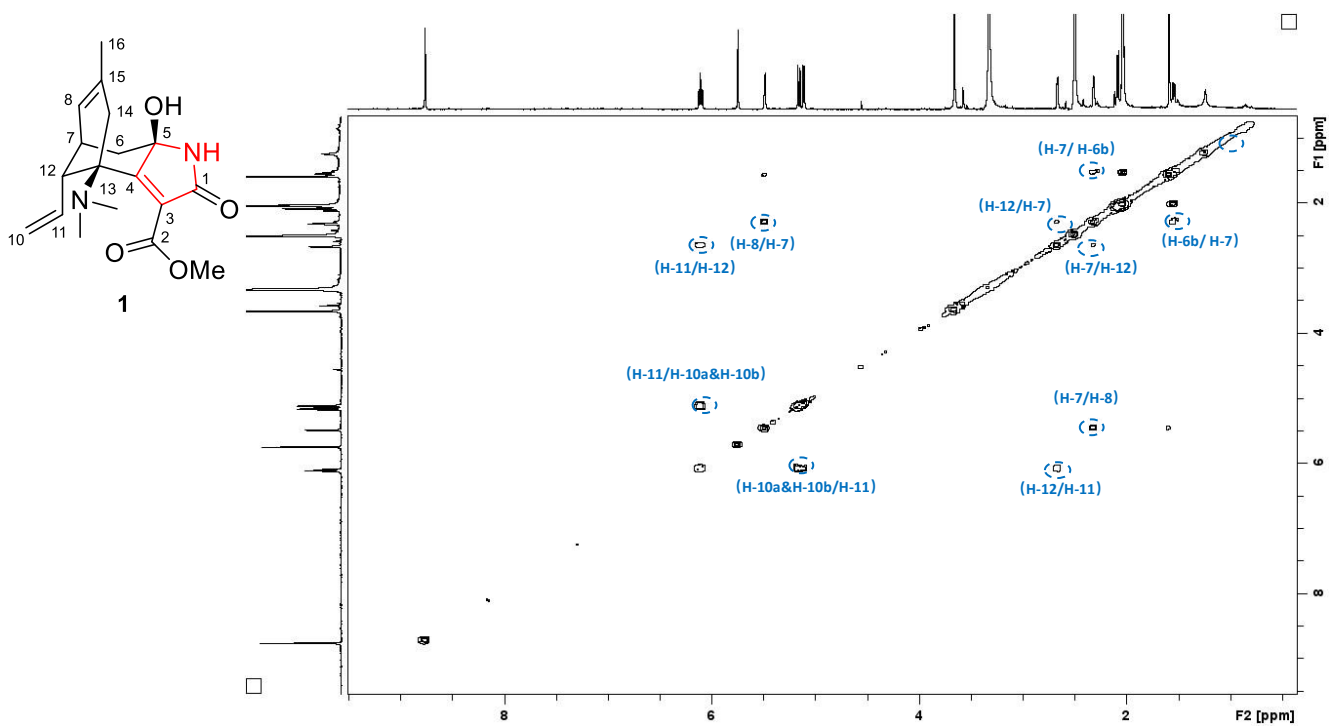

**Figure S5.**  $^1\text{H}$ - $^1\text{H}$  COSY spectrum of compound **1** in  $\text{DMSO}-d_6$  (800 MHz)

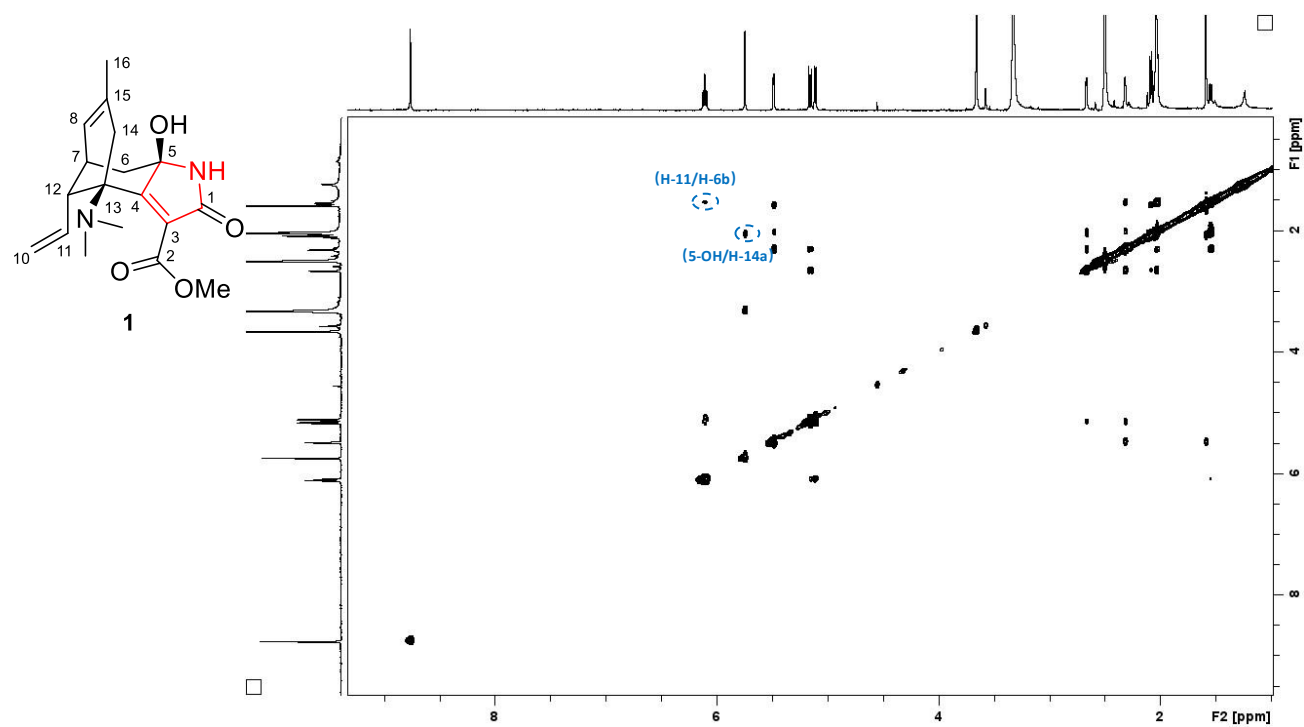

**Figure S6.** ROESY spectrum of compound **1** in  $\text{DMSO}-d_6$  (800 MHz)

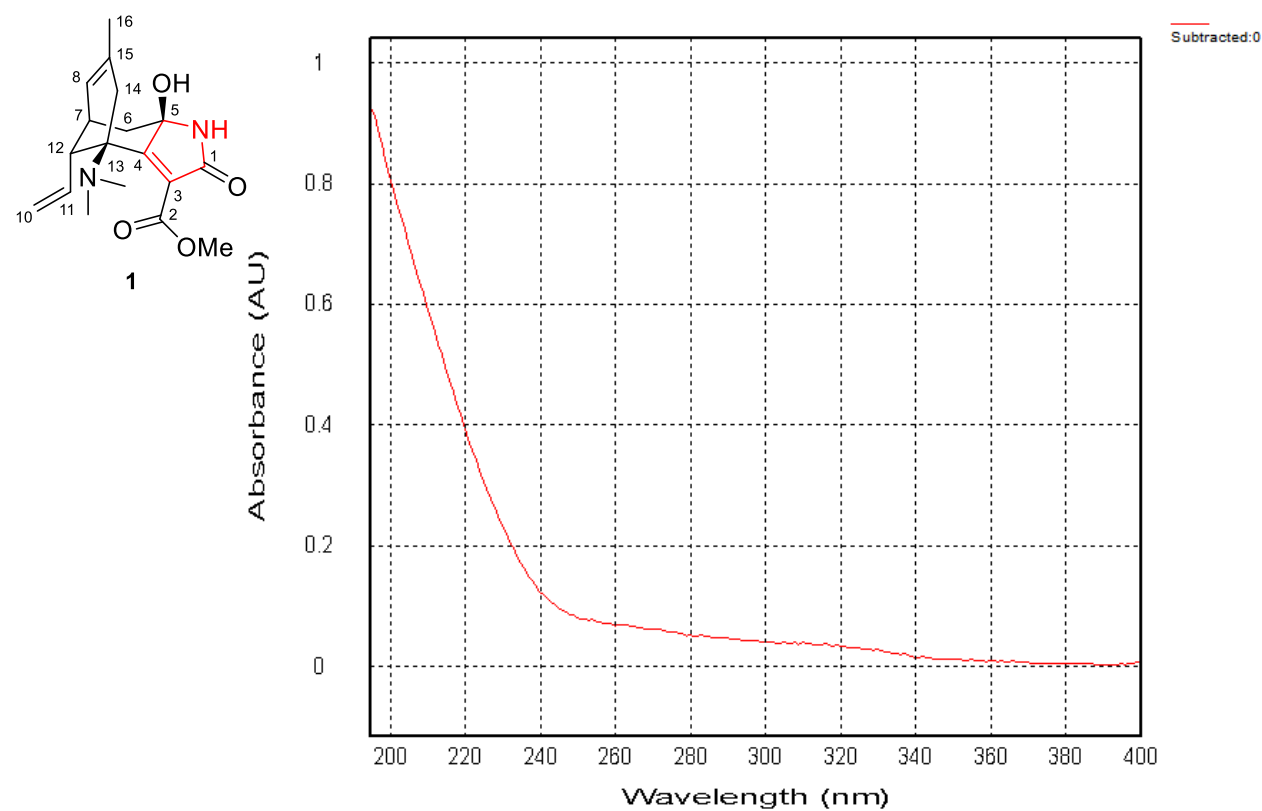

**Figure S7. UV spectrum of compound 1**

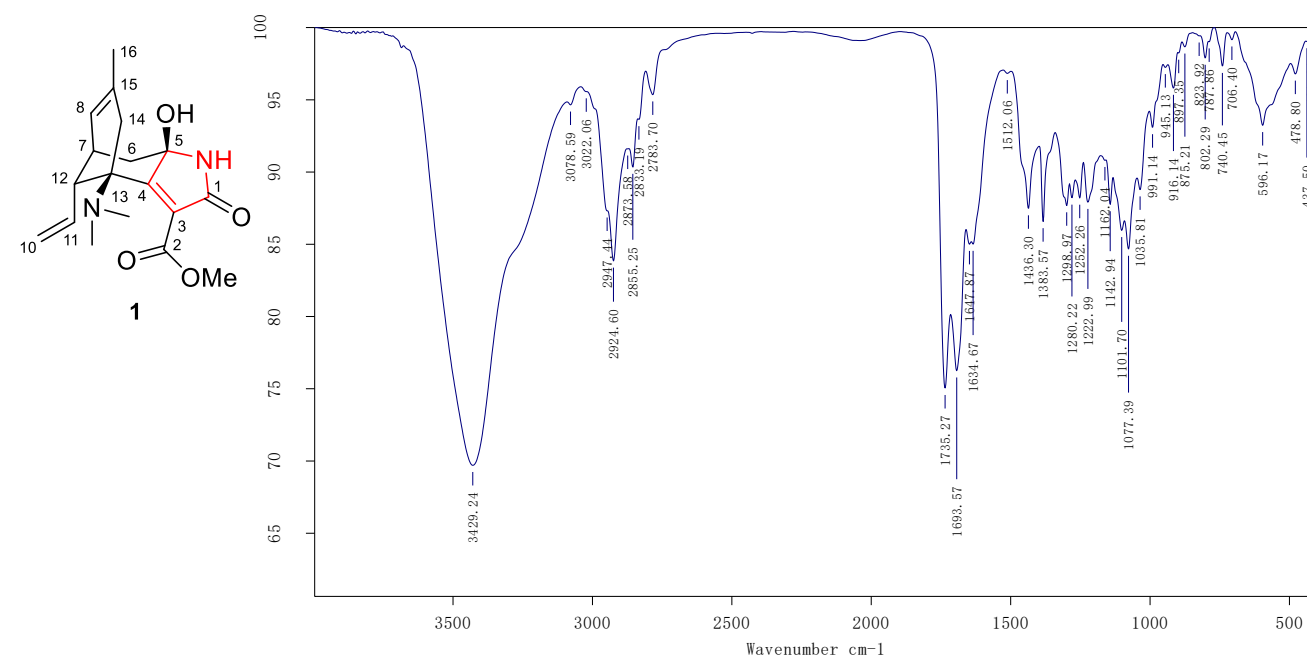

**Figure S8. IR spectrum of compound 1**

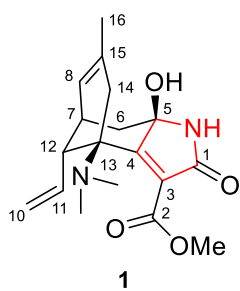

# User Spectra

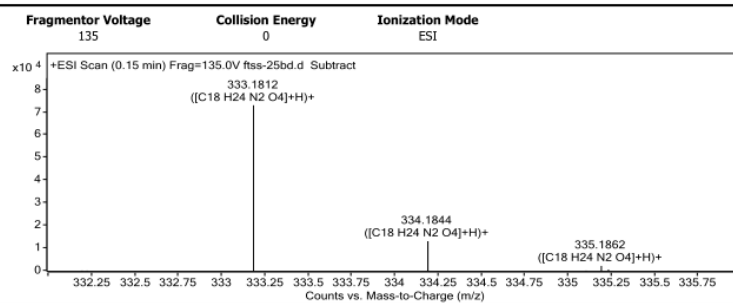

## Peak List

| m/z      | z | Abund    | Formula       | Ion    |
|----------|---|----------|---------------|--------|
| 333.1812 | 1 | 73158.77 | C18 H24 N2 O4 | (M+H)+ |
| 334.1844 | 1 | 13353.29 | C18 H24 N2 O4 | (M+H)+ |
| 355.1632 | 1 | 61820.29 |               |        |
| 356.1664 | 1 | 9945.4   |               |        |
| 357.2172 | 1 | 7649.1   |               |        |
| 371.1365 | 1 | 5903.56  |               |        |
| 415.1517 | 1 | 8126.96  |               |        |
| 687.3372 | 1 | 55840.3  |               |        |
| 688.3398 | 1 | 21394.15 |               |        |
| 689.3424 | 1 | 5442.51  |               |        |

## Formula Calculator Element Limits

| Element | Min | Max |
|---------|-----|-----|
| C       | 3   | 60  |
| H       | 0   | 120 |
| O       | 0   | 30  |
| N       | 0   | 5   |

## Formula Calculator Results

| Formula       | CalculatedMass | CalculatedMz | Mz       | Diff. (mDa) | Diff. (ppm) | DBE    |
|---------------|----------------|--------------|----------|-------------|-------------|--------|
| C18 H24 N2 O4 | 332.1736       | 333.1809     | 333.1812 | -0.30       | -0.90       | 8.0000 |

--- End Of Report ---

**Figure S9.** HRESIMS spectrum of compound **1**

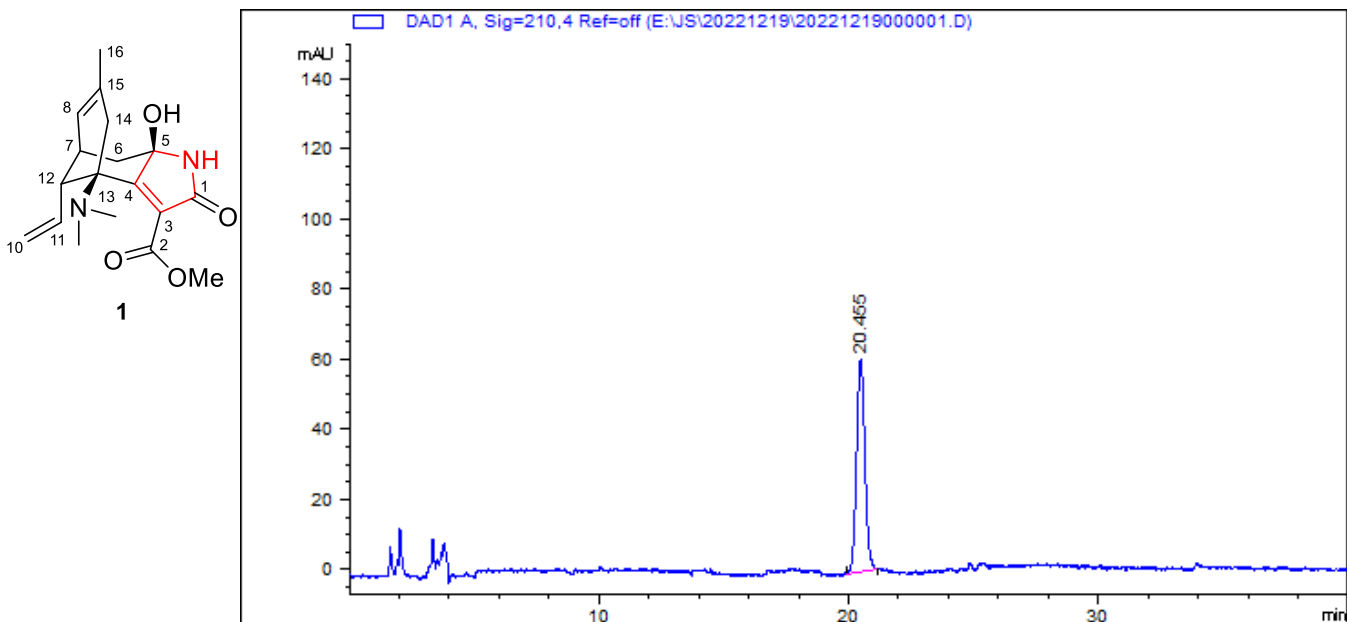

**Figure S10.** HPLC chromatogram of compound **1** (MeOH/H<sub>2</sub>O/NH<sub>3</sub>·H<sub>2</sub>O, 4.5:5.5:0.005, 3.6 mL/min)

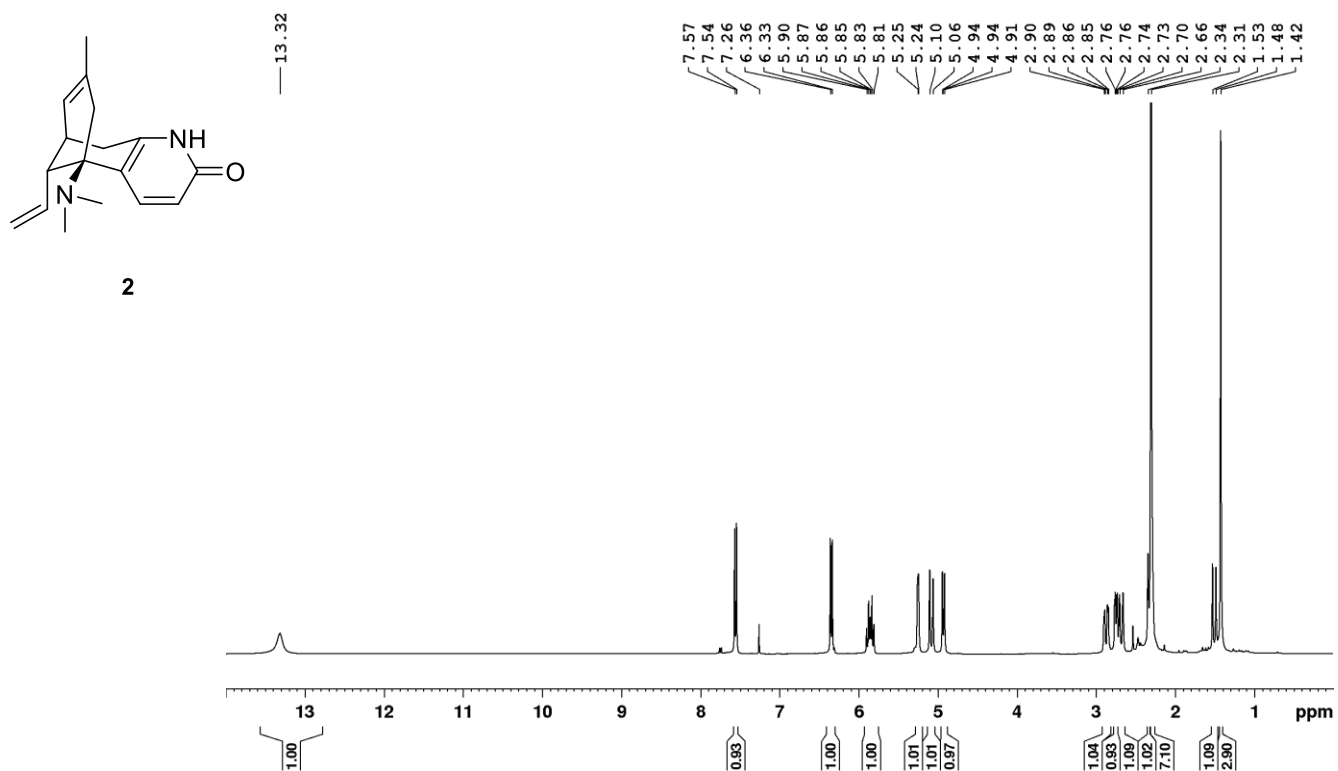

**Figure S11.** <sup>1</sup>H NMR spectrum of compound **2** in CDCl<sub>3</sub> (400 MHz)

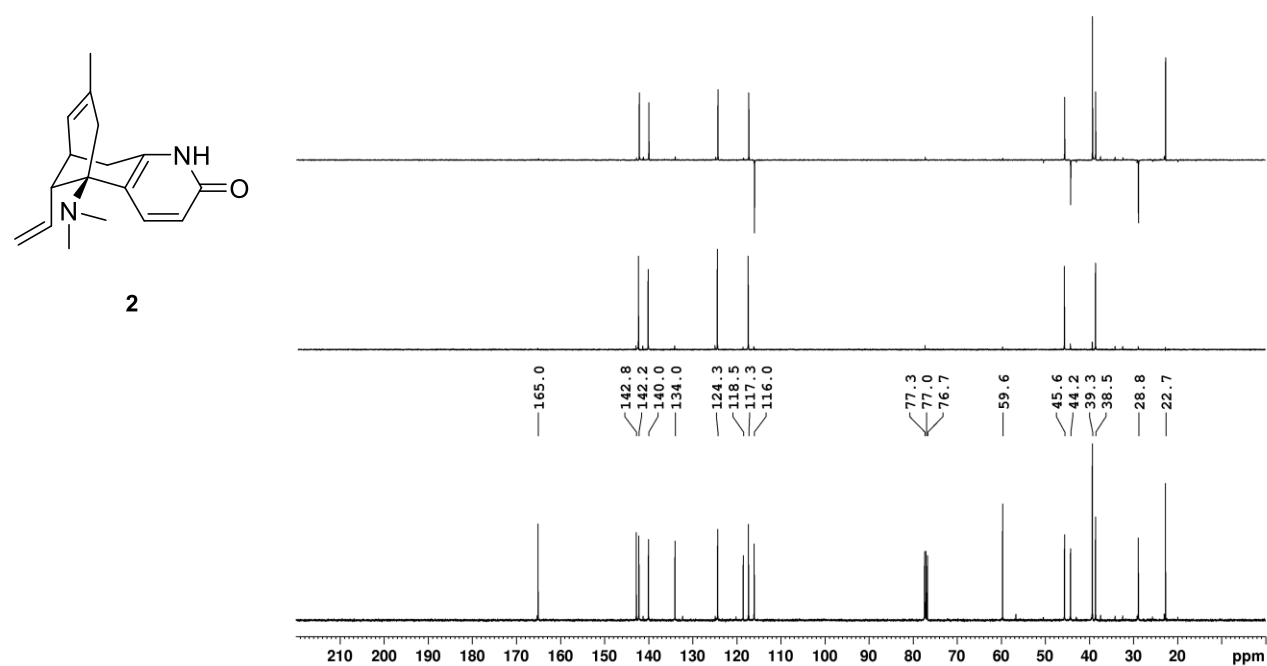

**Figure S12.** <sup>13</sup>C NMR and DEPT spectra of compound **2** in CDCl<sub>3</sub> (100 MHz)



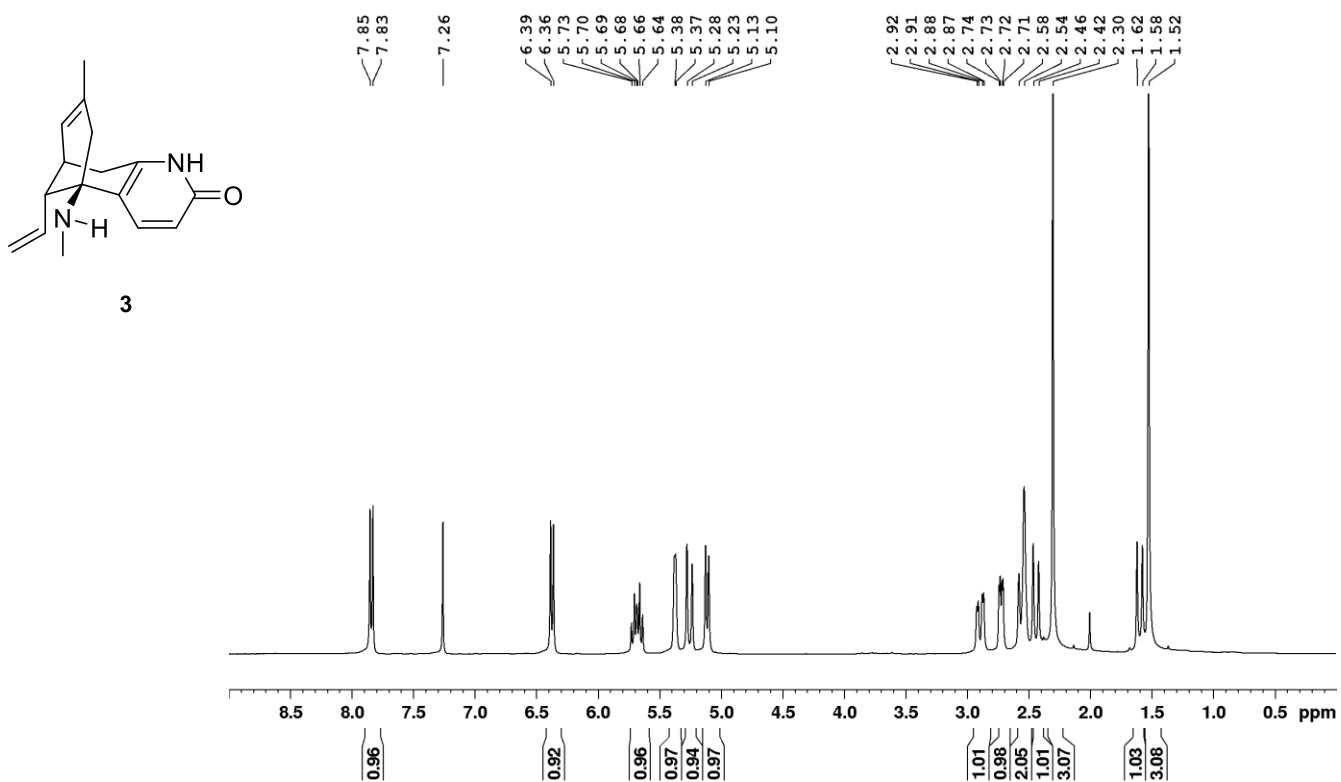

**Figure S13.**  $^1\text{H}$  NMR spectrum of compound **3** in  $\text{CDCl}_3$  (400 MHz)

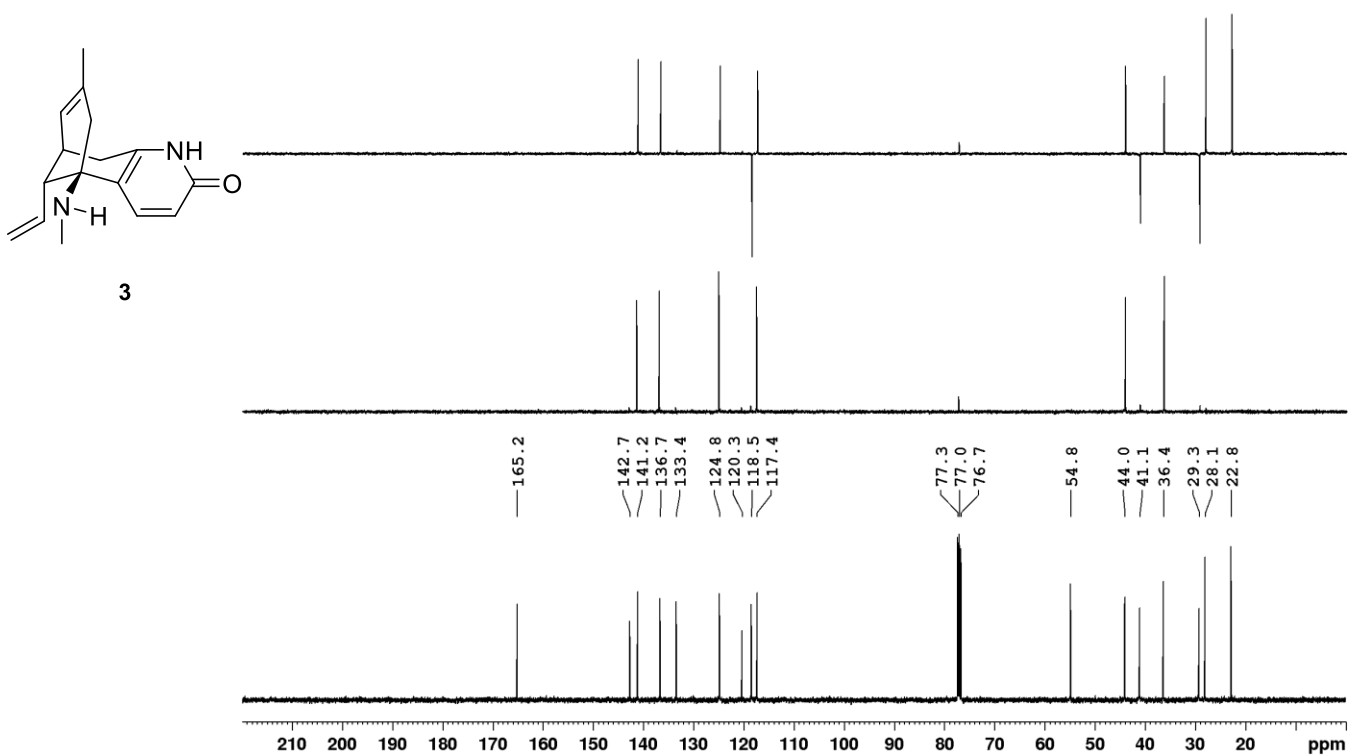

**Figure S14.**  $^{13}\text{C}$  NMR and DEPT spectra of compound **3** in  $\text{CDCl}_3$  (100 MHz)

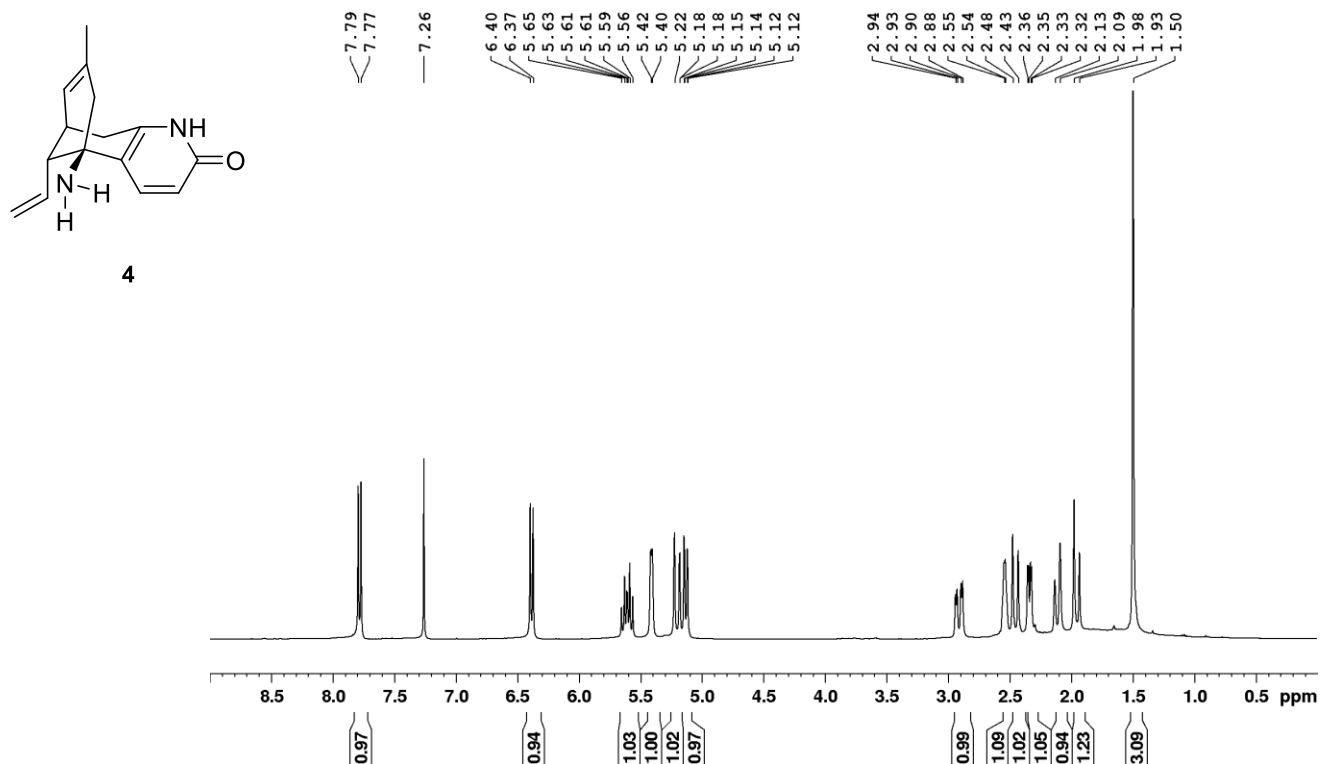

**Figure S15.**  $^1\text{H}$  NMR spectrum of compound **4** in  $\text{CDCl}_3$  (400 MHz)

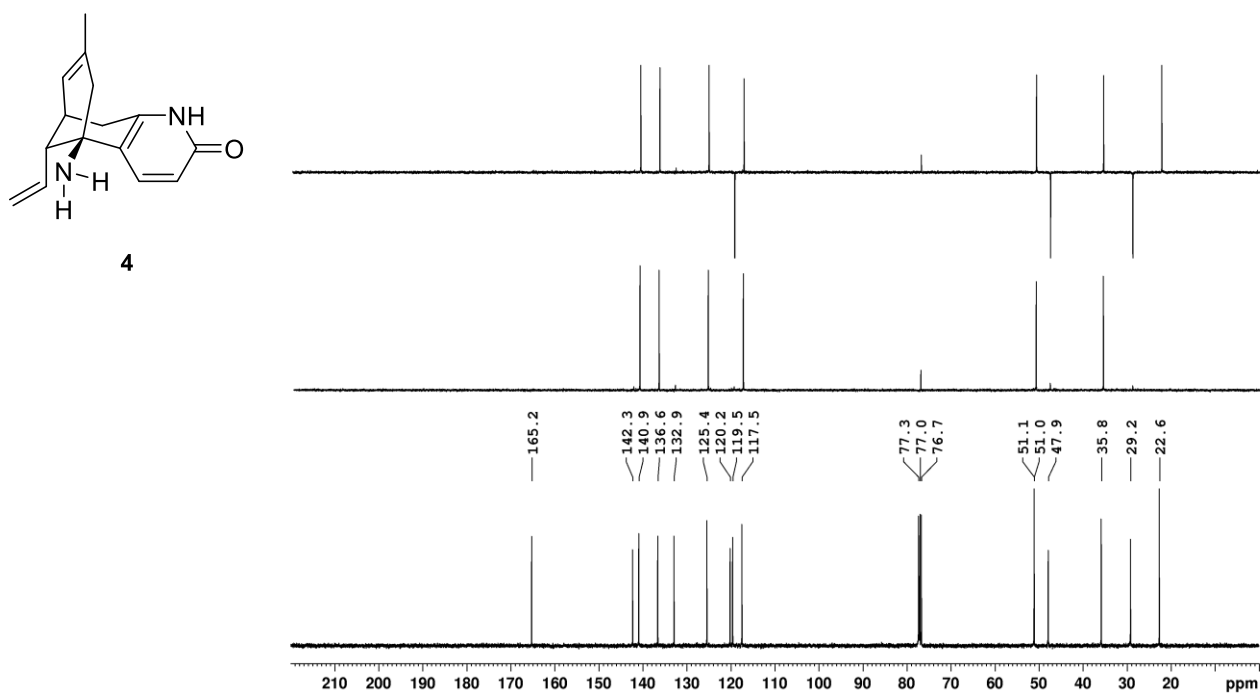

**Figure S16.**  $^{13}\text{C}$  NMR and DEPT spectra of compound **4** in  $\text{CDCl}_3$  (100 MHz)

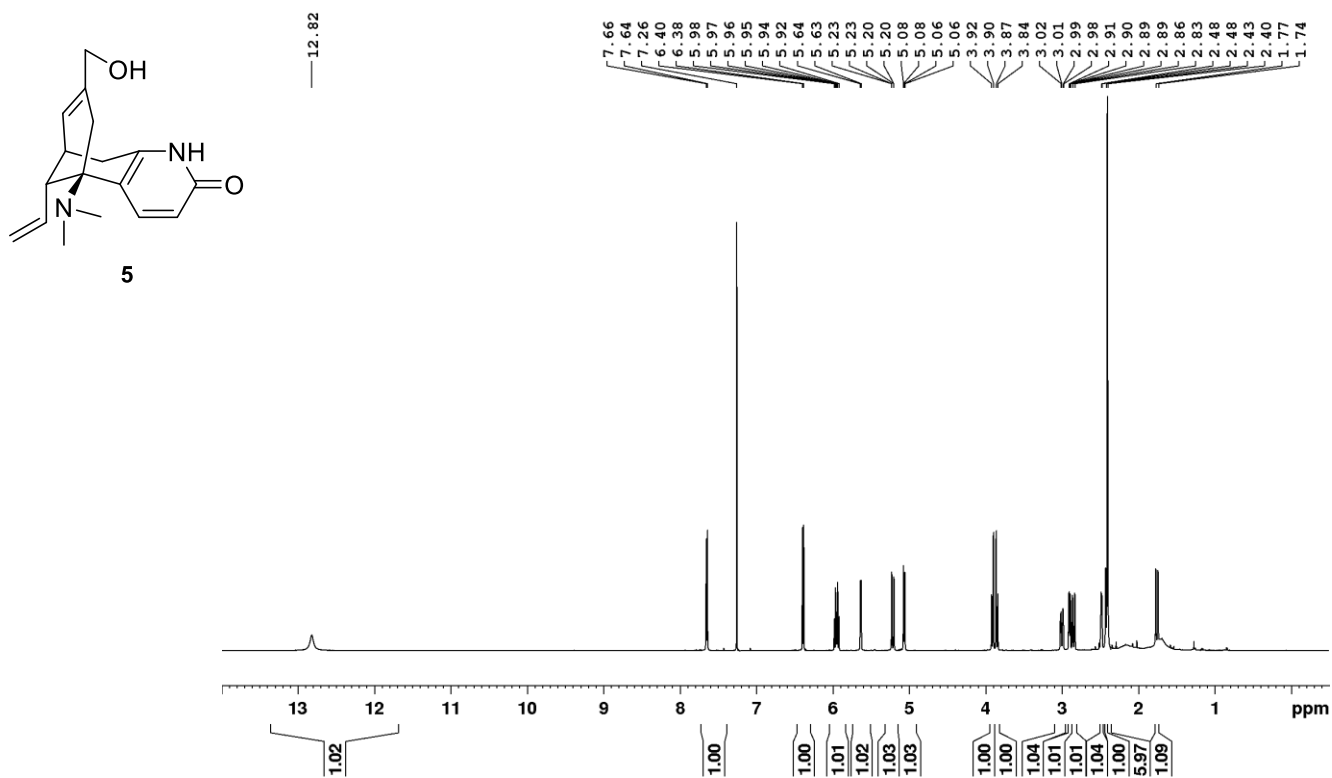

**Figure S17.** <sup>1</sup>H NMR spectrum of compound **5** in CDCl<sub>3</sub> (600 MHz)

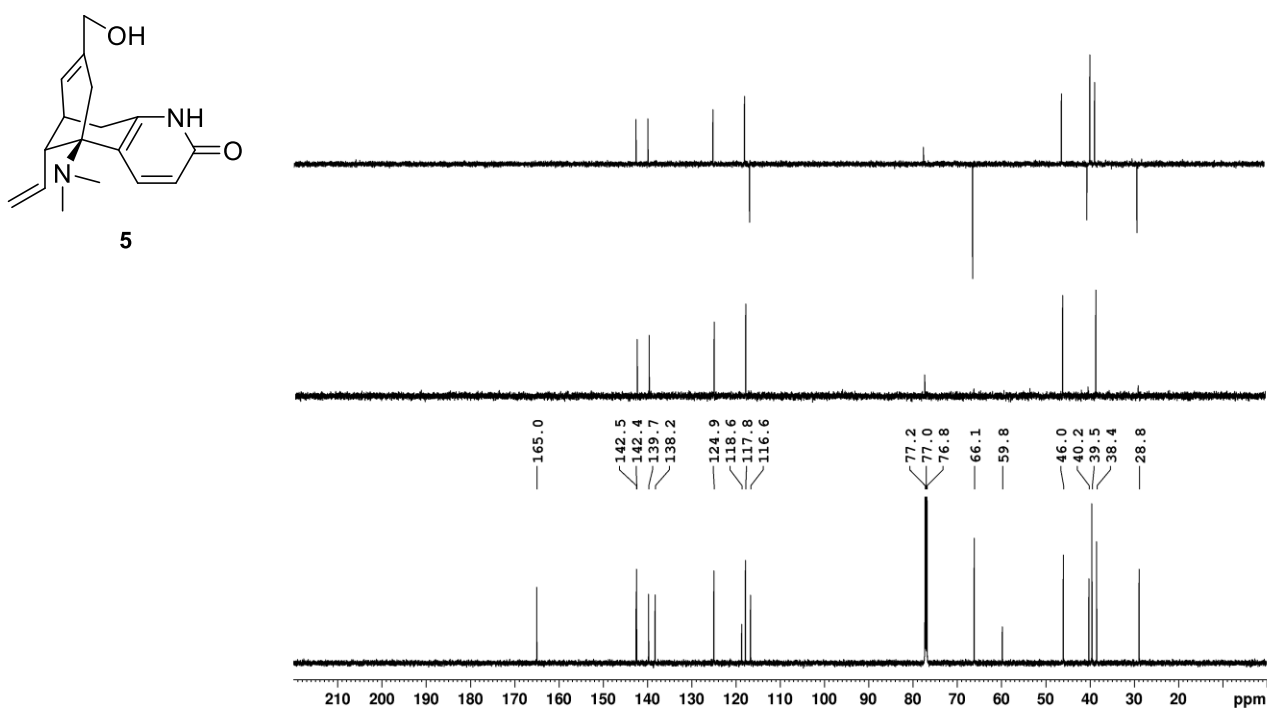

**Figure S18.** <sup>13</sup>C NMR and DEPT spectra of compound **5** in CDCl<sub>3</sub> (150 MHz)

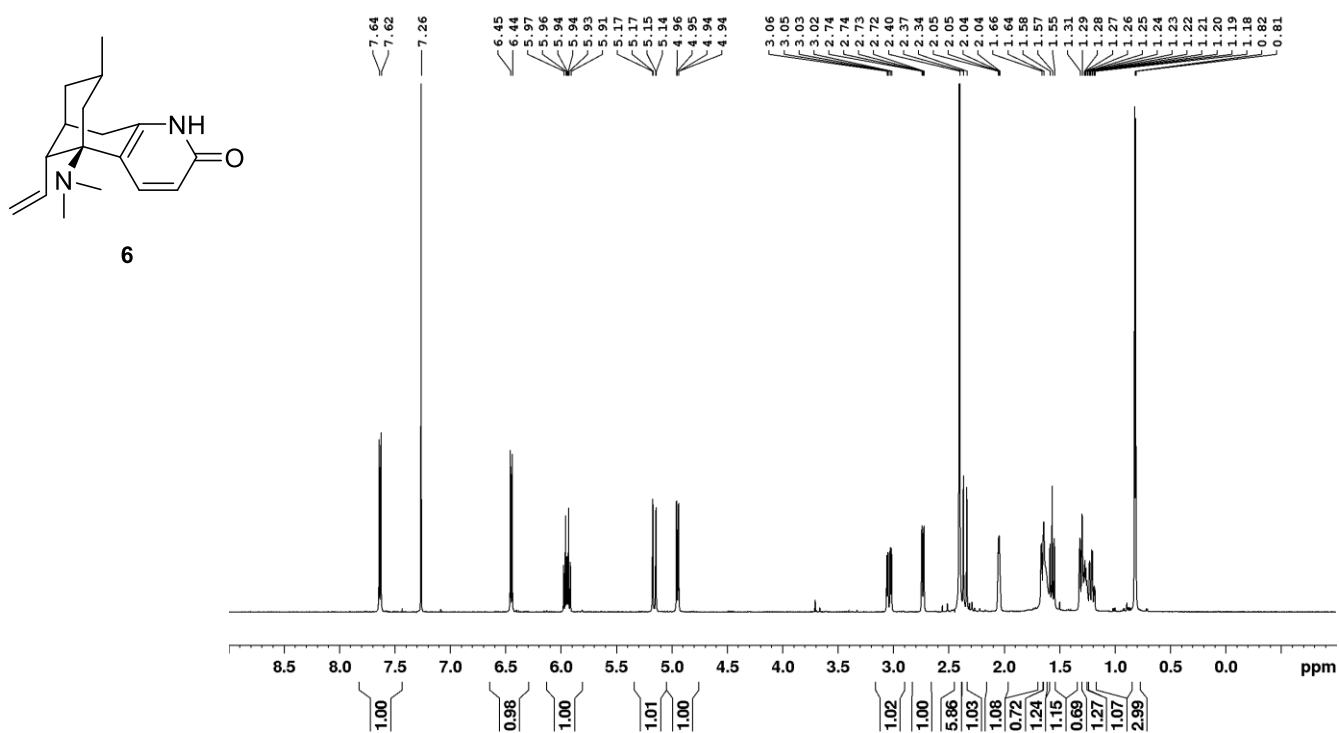

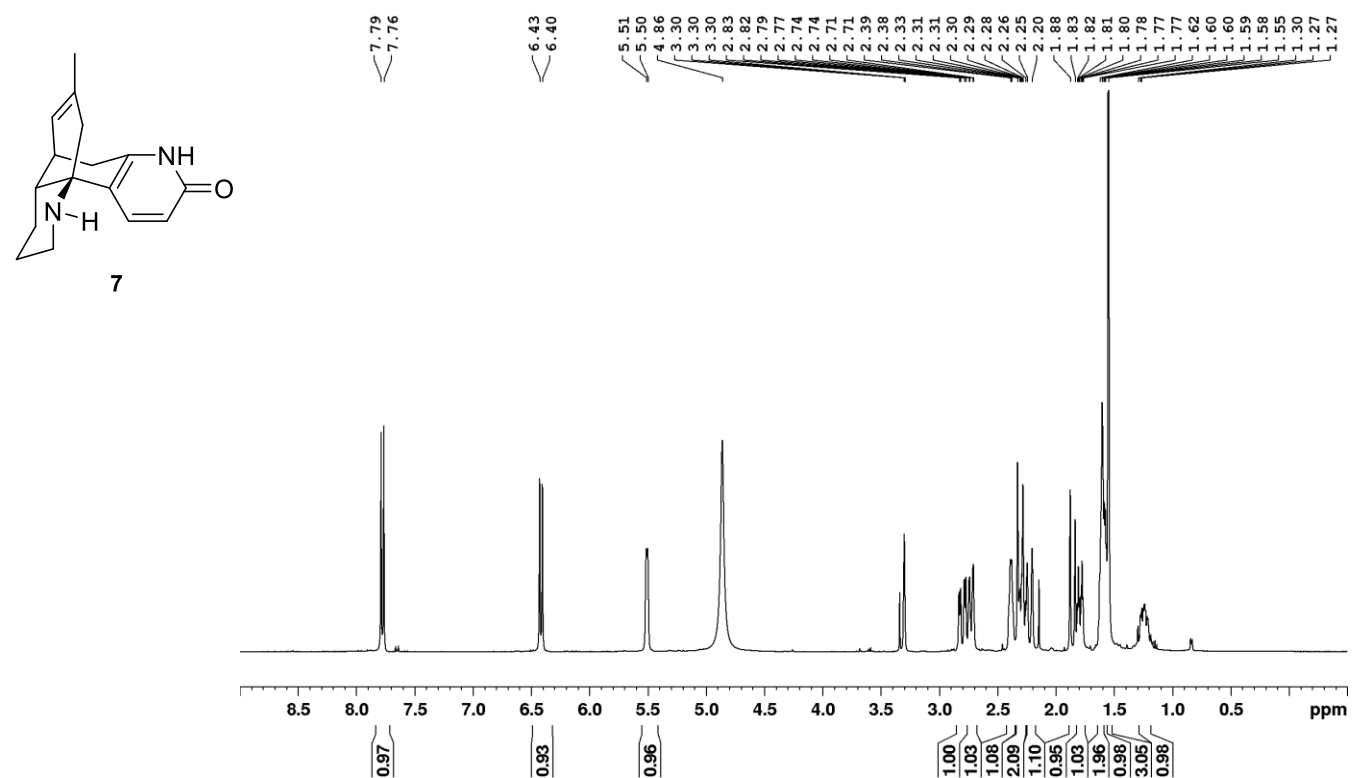

**Figure S21.** <sup>1</sup>H NMR spectrum of compound **7** in CD<sub>3</sub>OD (400 MHz)

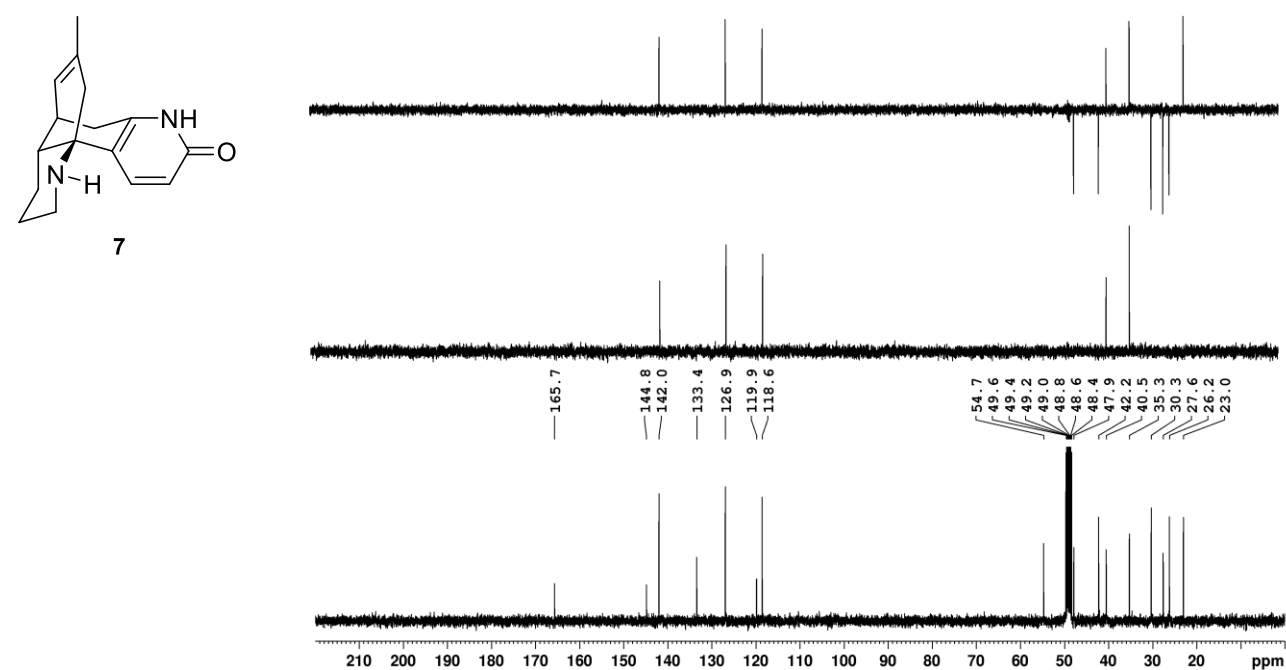

**Figure S22.** <sup>13</sup>C NMR and DEPT spectra of compound **7** in CD<sub>3</sub>OD (100 MHz)

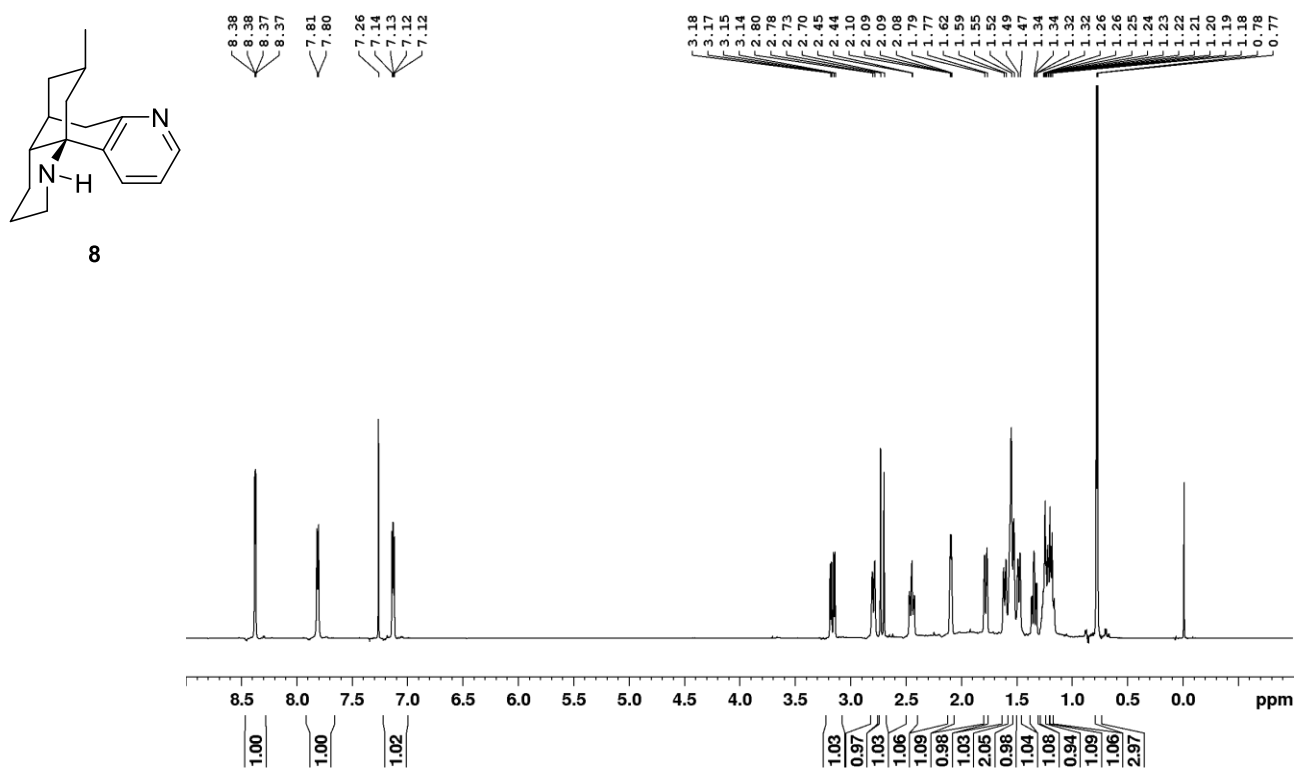

**Figure S23.** <sup>1</sup>H NMR spectrum of compound **8** in CDCl<sub>3</sub> (600 MHz)

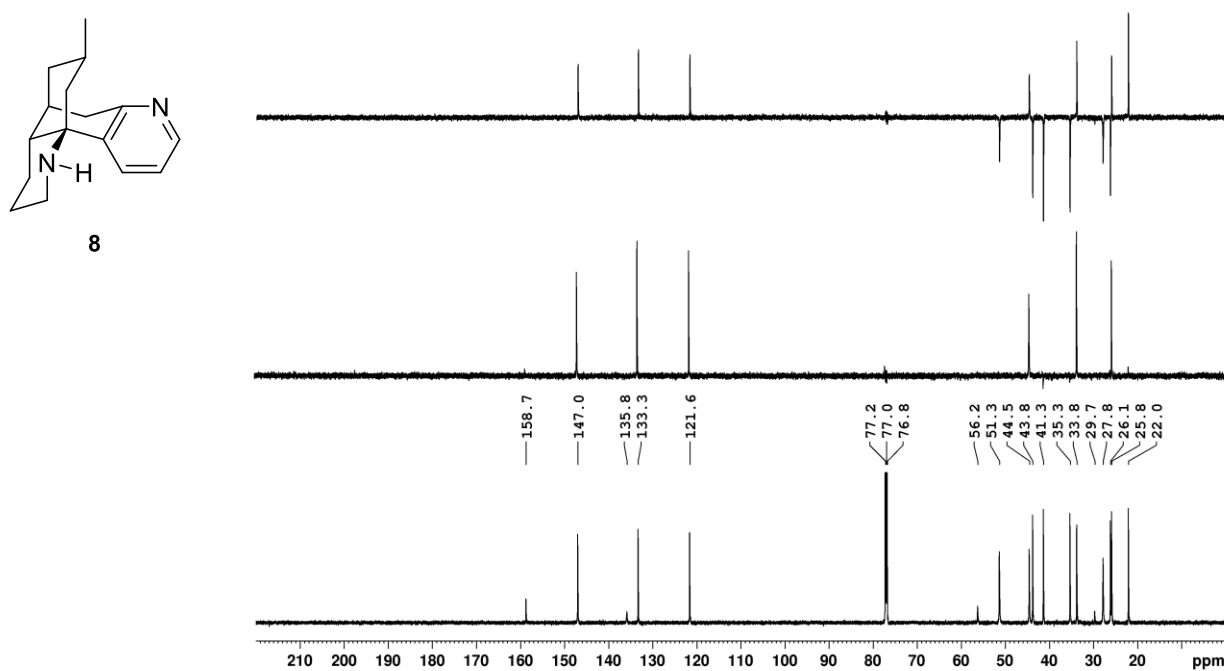

**Figure S24.** <sup>13</sup>C NMR and DEPT spectra of compound **8** in CDCl<sub>3</sub> (150 MHz)

|                                  |                   |       |                 |       |                                     |       |             |       |
|----------------------------------|-------------------|-------|-----------------|-------|-------------------------------------|-------|-------------|-------|
| spectra                          | <sup>1</sup> H    |       | <sup>13</sup> C |       | DEPT90                              |       | DEPT135     |       |
| pulse sequence                   | zg30              |       | zgdc            |       | deptsp90                            |       | deptsp135   |       |
| temperature [k]                  | 300.0             |       | 300.0           |       | 300.0                               |       | 300.0       |       |
| relaxation delay (D1) time [sec] | 2                 |       | 2               |       | 2                                   |       | 2           |       |
| number of scans (NS)             | 4                 |       | 1000            |       | 300                                 |       | 300         |       |
| frequency [MHz]                  | 800               |       | 200             |       | 200                                 |       | 200         |       |
| sweep width (SW) [Hz]            | 16025             |       | 48076           |       | 48076                               |       | 48076       |       |
| acquisition time (AQ) [sec]      | 2.044             |       | 0.681           |       | 0.681                               |       | 0.681       |       |
| spectra                          | HSQC              |       | HMBC            |       | <sup>1</sup> H– <sup>1</sup> H COSY |       | ROESY       |       |
| pulse sequence                   | hsqcetgpprsisp2.2 |       | hmbcgpndqf      |       | cosygpppqf                          |       | roesygppl19 |       |
| temperature [k]                  | 300.0             |       | 300.0           |       | 300.0                               |       | 300.0       |       |
| relaxation delay (D1) time [sec] | 1.5               |       | 1.5             |       | 1                                   |       | 1.5         |       |
| number of scans (NS)             | 8                 |       | 24              |       | 6                                   |       | 16          |       |
| f                                | f2                | f1    | f2              | f1    | f2                                  | f1    | f2          | f2    |
| frequency [MHz]                  | 800               | 200   | 800             | 200   | 800                                 | 800   | 800         | 800   |
| sweep width (SW) [Hz]            | 12019             | 30188 | 8802            | 45082 | 12019                               | 12019 | 12019       | 12019 |
| acquisition time (AQ) [sec]      | 0.085             | 0.002 | 0.232           | 0.232 | 0.085                               | 0.007 | 0.085       | 0.085 |

**Table S1.** Detailed NMR parameters of compound **1**.

|                                  |                |                 |        |         |
|----------------------------------|----------------|-----------------|--------|---------|
| spectra                          | <sup>1</sup> H | <sup>13</sup> C | DEPT90 | DEPT135 |
| pulse sequence                   | zg             | zpgp30          | dept90 | dept135 |
| temperature [k]                  | 300.0          | 300.0           | 300.0  | 300.0   |
| relaxation delay (D1) time [sec] | 2              | 2               | 2      | 2       |
| number of scans (NS)             | 4              | 70              | 35     | 70      |
| frequency [MHz]                  | 400            | 100             | 100    | 100     |
| sweep width (SW) [Hz]            | 8012           | 24038           | 24038  | 23809   |
| acquisition time (AQ) [sec]      | 4.089          | 1.363           | 1.363  | 1.376   |

**Table S2.** Detailed NMR parameters of compound **2**.

|                                  |                |                 |        |         |
|----------------------------------|----------------|-----------------|--------|---------|
| spectra                          | <sup>1</sup> H | <sup>13</sup> C | DEPT90 | DEPT135 |
| pulse sequence                   | zg             | zgpg30          | dept90 | dept135 |
| temperature [k]                  | 300.0          | 300.0           | 300.0  | 300.0   |
| relaxation delay (D1) time [sec] | 2              | 2               | 2      | 2       |
| number of scans (NS)             | 4              | 70              | 35     | 70      |
| frequency [MHz]                  | 400            | 100             | 100    | 100     |
| sweep width (SW) [Hz]            | 8012           | 24038           | 24038  | 23809   |
| acquisition time (AQ) [sec]      | 4.089          | 1.363           | 1.363  | 1.376   |

**Table S3.** Detailed NMR parameters of compound **3**.

|                                  |                |                 |        |         |
|----------------------------------|----------------|-----------------|--------|---------|
| spectra                          | <sup>1</sup> H | <sup>13</sup> C | DEPT90 | DEPT135 |
| pulse sequence                   | zg             | zgpg30          | dept90 | dept135 |
| temperature [k]                  | 300.0          | 300.0           | 300.0  | 300.0   |
| relaxation delay (D1) time [sec] | 2              | 2               | 2      | 2       |
| number of scans (NS)             | 4              | 85              | 40     | 45      |
| frequency [MHz]                  | 400            | 100             | 100    | 100     |
| sweep width (SW) [Hz]            | 8012           | 24038           | 24038  | 23809   |
| acquisition time (AQ) [sec]      | 4.089          | 1.363           | 1.363  | 1.376   |

**Table S4.** Detailed NMR parameters of compound **4**.

|                                  |                |                 |        |         |
|----------------------------------|----------------|-----------------|--------|---------|
| spectra                          | <sup>1</sup> H | <sup>13</sup> C | DEPT90 | DEPT135 |
| pulse sequence                   | zg30           | zgdc            | dept90 | dept135 |
| temperature [k]                  | 300.0          | 300.0           | 300.0  | 300.0   |
| relaxation delay (D1) time [sec] | 1              | 2               | 2      | 2       |
| number of scans (NS)             | 4              | 256             | 64     | 128     |
| frequency [MHz]                  | 600            | 150             | 150    | 150     |
| sweep width (SW) [Hz]            | 16741          | 39062           | 39062  | 46875   |
| acquisition time (AQ) [sec]      | 1.957          | 0.838           | 0.838  | 0.699   |

**Table S5.** Detailed NMR parameters of compound **5**.



|                                  |                |                 |        |         |
|----------------------------------|----------------|-----------------|--------|---------|
| spectra                          | <sup>1</sup> H | <sup>13</sup> C | DEPT90 | DEPT135 |
| pulse sequence                   | zg30           | zgdc            | dept90 | dept135 |
| temperature [k]                  | 300.0          | 300.0           | 300.0  | 300.0   |
| relaxation delay (D1) time [sec] | 1              | 2               | 2      | 2       |
| number of scans (NS)             | 4              | 256             | 64     | 128     |
| frequency [MHz]                  | 600            | 150             | 150    | 150     |
| sweep width (SW) [Hz]            | 16741          | 39062           | 46875  | 46875   |
| acquisition time (AQ) [sec]      | 1.957          | 0.838           | 0.699  | 0.699   |

**Table S6.** Detailed NMR parameters of compound **6**.

|                                  |                |                 |        |         |
|----------------------------------|----------------|-----------------|--------|---------|
| spectra                          | <sup>1</sup> H | <sup>13</sup> C | DEPT90 | DEPT135 |
| pulse sequence                   | zg             | zgdc            | dept90 | dept135 |
| temperature [k]                  | 300.0          | 300.0           | 300.0  | 300.0   |
| relaxation delay (D1) time [sec] | 2              | 3               | 2      | 2       |
| number of scans (NS)             | 4              | 148             | 29     | 96      |
| frequency [MHz]                  | 400            | 100             | 100    | 100     |
| sweep width (SW) [Hz]            | 8012           | 24038           | 24038  | 23809   |
| acquisition time (AQ) [sec]      | 4.089          | 1.363           | 1.363  | 1.376   |

**Table S7.** Detailed NMR parameters of compound **7**.

|                                  |                |                 |          |           |
|----------------------------------|----------------|-----------------|----------|-----------|
| spectra                          | <sup>1</sup> H | <sup>13</sup> C | DEPT90   | DEPT135   |
| pulse sequence                   | zg30           | zgdc            | deptsp90 | deptsp135 |
| temperature [k]                  | 300.0          | 300.0           | 300.0    | 300.0     |
| relaxation delay (D1) time [sec] | 10             | 2               | 2        | 2         |
| number of scans (NS)             | 4              | 512             | 256      | 256       |
| frequency [MHz]                  | 600            | 150             | 150      | 150       |
| sweep width (SW) [Hz]            | 12019          | 36231           | 36231    | 36231     |
| acquisition time (AQ) [sec]      | 2.726          | 0.904           | 0.904    | 0.904     |

**Table S8.** Detailed NMR parameters of compound **8**.
